# Supplementary material
Source: MDPI journal article supplement (https://www.mdpi.com/2304-6740/7/4/45)

## checkCIF/PLATON report

Structure factors have been supplied for datablock(s) Bi8TlAlCl43\_170K

THIS REPORT IS FOR GUIDANCE ONLY. IF USED AS PART OF A REVIEW PROCEDURE FOR PUBLICATION, IT SHOULD NOT REPLACE THE EXPERTISE OF AN EXPERIENCED CRYSTALLOGRAPHIC REFEREE.

|                         |                |                          |
|-------------------------|----------------|--------------------------|
| No syntax errors found. | CIF dictionary | Interpreting this report |
|-------------------------|----------------|--------------------------|

**Datablock: Bi8TlAlCl43 170K**

Bond precision: Cl-Al = 0.0367 Å Wavelength=0.71073

|              |               |               |               |
|--------------|---------------|---------------|---------------|
| Cell:        | a=26.1108(11) | b=26.1108(11) | c=31.2199(13) |
|              | alpha=90      | beta=90       | gamma=120     |
| Temperature: | 170 K         |               |               |

|                        | Calculated                                                                                                                                                                                      | Reported                                                         |
|------------------------|-------------------------------------------------------------------------------------------------------------------------------------------------------------------------------------------------|------------------------------------------------------------------|
| Volume                 | 18433(2)                                                                                                                                                                                        | 18433.3(17)                                                      |
| Space group            | P 65                                                                                                                                                                                            | P 65                                                             |
| Hall group             | P 65                                                                                                                                                                                            | P 65                                                             |
| Moiety formula         | Al <sub>3</sub> Bi <sub>0.74</sub> Cl <sub>12</sub> , Al <sub>3</sub> Bi <sub>0.80</sub> Cl <sub>12</sub> , 3(Bi <sub>2.51</sub> Tl <sub>14</sub> ), 3(Al Bi <sub>0.46</sub> Cl <sub>12</sub> ) | ?                                                                |
| Sum formula            | Al <sub>36</sub> Bi <sub>96</sub> Cl <sub>144</sub> Tl <sub>12</sub>                                                                                                                            | Al <sub>3</sub> Bi <sub>8</sub> Cl <sub>12</sub> Tl <sub>1</sub> |
| Mr                     | 28590.71                                                                                                                                                                                        | 2382.55                                                          |
| Dx, g cm <sup>-3</sup> | 5.151                                                                                                                                                                                           | 5.151                                                            |
| Z                      | 2                                                                                                                                                                                               | 24                                                               |
| Mu (mm <sup>-1</sup> ) | 51.992                                                                                                                                                                                          | 51.992                                                           |
| F000                   | 23712.0                                                                                                                                                                                         | 23712.0                                                          |
| F000'                  | 23002.68                                                                                                                                                                                        |                                                                  |
| h,k,lmax               | 31,31,37                                                                                                                                                                                        | 31,31,37                                                         |
| Nref                   | 21992[ 11217]                                                                                                                                                                                   | 21762                                                            |
| Tmin,Tmax              | 0.011,0.049                                                                                                                                                                                     | 0.097,0.250                                                      |
| Tmin'                  | 0.004                                                                                                                                                                                           |                                                                  |

```
Correction method= # Reported T Limits: Tmin=0.097 Tmax=0.250
AbsCorr = NUMERICAL
```

Data completeness= 1.94/0.99      Theta(max)= 25.141

R(reflections)= 0.0488( 6278)      wR2(reflections)= 0.0583( 21762)

S = 0.932                      Npar= 637

The following ALERTS were generated. Each ALERT has the format

**test-name\_ALERT\_alert-type\_alert-level.**

Click on the hyperlinks for more details of the test.

### ● Alert level C

RINTA01\_ALERT\_3\_C The value of Rint is greater than 0.12  
 Rint given 0.169  
 STRVA01\_ALERT\_4\_C Flack test results are ambiguous.  
 From the CIF: \_refine\_ls\_abs\_structure\_Flack 0.466  
 From the CIF: \_refine\_ls\_abs\_structure\_Flack\_su 0.019  
 PLAT018\_ALERT\_1\_C \_diffn\_measured\_fraction\_theta\_max .NE. \* \_full ! Check  
 PLAT214\_ALERT\_2\_C Atom B303 (Anion/Solvent) ADP max/min Ratio 4.4 prolat  
 PLAT214\_ALERT\_2\_C Atom B203 (Anion/Solvent) ADP max/min Ratio 4.4 prolat  
 PLAT214\_ALERT\_2\_C Atom Bi03 (Anion/Solvent) ADP max/min Ratio 4.4 prolat  
 PLAT244\_ALERT\_4\_C Low 'Solvent' Ueq as Compared to Neighbors of Cl21 Check

### ● Alert level G

PLAT002\_ALERT\_2\_G Number of Distance or Angle Restraints on AtSite 64 Note  
 PLAT004\_ALERT\_5\_G Polymeric Structure Found with Maximum Dimension 1 Info  
 PLAT017\_ALERT\_1\_G Check Scattering Type Consistency of B117 as BI  
 PLAT017\_ALERT\_1\_G Check Scattering Type Consistency of B118 as BI  
 PLAT017\_ALERT\_1\_G Check Scattering Type Consistency of B119 as BI  
 PLAT017\_ALERT\_1\_G Check Scattering Type Consistency of B120 as BI  
 PLAT017\_ALERT\_1\_G Check Scattering Type Consistency of B121 as BI  
 PLAT017\_ALERT\_1\_G Check Scattering Type Consistency of B122 as BI  
 PLAT017\_ALERT\_1\_G Check Scattering Type Consistency of B123 as BI  
 PLAT017\_ALERT\_1\_G Check Scattering Type Consistency of B124 as BI  
 PLAT017\_ALERT\_1\_G Check Scattering Type Consistency of B201 as BI  
 PLAT017\_ALERT\_1\_G Check Scattering Type Consistency of B202 as BI  
 PLAT017\_ALERT\_1\_G Check Scattering Type Consistency of B203 as BI  
 PLAT017\_ALERT\_1\_G Check Scattering Type Consistency of B204 as BI  
 PLAT017\_ALERT\_1\_G Check Scattering Type Consistency of B205 as BI  
 PLAT017\_ALERT\_1\_G Check Scattering Type Consistency of B206 as BI  
 PLAT017\_ALERT\_1\_G Check Scattering Type Consistency of B207 as BI  
 PLAT017\_ALERT\_1\_G Check Scattering Type Consistency of B208 as BI  
 PLAT017\_ALERT\_1\_G Check Scattering Type Consistency of B217 as BI  
 PLAT017\_ALERT\_1\_G Check Scattering Type Consistency of B218 as BI  
 PLAT017\_ALERT\_1\_G Check Scattering Type Consistency of B219 as BI  
 PLAT017\_ALERT\_1\_G Check Scattering Type Consistency of B220 as BI  
 PLAT017\_ALERT\_1\_G Check Scattering Type Consistency of B221 as BI  
 PLAT017\_ALERT\_1\_G Check Scattering Type Consistency of B222 as BI  
 PLAT017\_ALERT\_1\_G Check Scattering Type Consistency of B223 as BI  
 PLAT017\_ALERT\_1\_G Check Scattering Type Consistency of B224 as BI  
 PLAT017\_ALERT\_1\_G Check Scattering Type Consistency of B301 as BI  
 PLAT017\_ALERT\_1\_G Check Scattering Type Consistency of B302 as BI  
 PLAT017\_ALERT\_1\_G Check Scattering Type Consistency of B303 as BI  
 PLAT017\_ALERT\_1\_G Check Scattering Type Consistency of B304 as BI  
 PLAT017\_ALERT\_1\_G Check Scattering Type Consistency of B305 as BI  
 PLAT017\_ALERT\_1\_G Check Scattering Type Consistency of B306 as BI  
 PLAT017\_ALERT\_1\_G Check Scattering Type Consistency of B307 as BI  
 PLAT017\_ALERT\_1\_G Check Scattering Type Consistency of B308 as BI  
 PLAT020\_ALERT\_3\_G The Value of Rint is Greater Than 0.12 ..... 0.169 Report  
 PLAT033\_ALERT\_4\_G Flack x Value Deviates > 3.0 \* sigma from Zero . 0.466 Note  
 PLAT045\_ALERT\_1\_G Calculated and Reported Z Differ by a Factor ... 0.08 Check  
 PLAT152\_ALERT\_1\_G The Supplied and Calc. Volume s.u. Differ by ... 3 Units  
 PLAT171\_ALERT\_4\_G The CIF-Embedded .res File Contains EADP Records 21 Report  
 PLAT176\_ALERT\_4\_G The CIF-Embedded .res File Contains SADI Records 32 Report  
 PLAT301\_ALERT\_3\_G Main Residue Disorder .....(Resd 1 ) 5% Note  
 PLAT301\_ALERT\_3\_G Main Residue Disorder .....(Resd 2 ) 5% Note

|                   |                                                  |      |      |
|-------------------|--------------------------------------------------|------|------|
| PLAT302_ALERT_4_G | Anion/Solvent/Minor-Residue Disorder (Resd 3 )   | 39%  | Note |
| PLAT302_ALERT_4_G | Anion/Solvent/Minor-Residue Disorder (Resd 4 )   | 8%   | Note |
| PLAT302_ALERT_4_G | Anion/Solvent/Minor-Residue Disorder (Resd 14 )  | 100% | Note |
| PLAT302_ALERT_4_G | Anion/Solvent/Minor-Residue Disorder (Resd 15 )  | 100% | Note |
| PLAT302_ALERT_4_G | Anion/Solvent/Minor-Residue Disorder (Resd 16 )  | 100% | Note |
| PLAT302_ALERT_4_G | Anion/Solvent/Minor-Residue Disorder (Resd 17 )  | 100% | Note |
| PLAT302_ALERT_4_G | Anion/Solvent/Minor-Residue Disorder (Resd 18 )  | 100% | Note |
| PLAT302_ALERT_4_G | Anion/Solvent/Minor-Residue Disorder (Resd 19 )  | 100% | Note |
| PLAT302_ALERT_4_G | Anion/Solvent/Minor-Residue Disorder (Resd 20 )  | 100% | Note |
| PLAT302_ALERT_4_G | Anion/Solvent/Minor-Residue Disorder (Resd 21 )  | 100% | Note |
| PLAT302_ALERT_4_G | Anion/Solvent/Minor-Residue Disorder (Resd 22 )  | 100% | Note |
| PLAT302_ALERT_4_G | Anion/Solvent/Minor-Residue Disorder (Resd 23 )  | 100% | Note |
| PLAT302_ALERT_4_G | Anion/Solvent/Minor-Residue Disorder (Resd 24 )  | 100% | Note |
| PLAT302_ALERT_4_G | Anion/Solvent/Minor-Residue Disorder (Resd 25 )  | 100% | Note |
| PLAT302_ALERT_4_G | Anion/Solvent/Minor-Residue Disorder (Resd 26 )  | 100% | Note |
| PLAT302_ALERT_4_G | Anion/Solvent/Minor-Residue Disorder (Resd 27 )  | 100% | Note |
| PLAT302_ALERT_4_G | Anion/Solvent/Minor-Residue Disorder (Resd 28 )  | 100% | Note |
| PLAT302_ALERT_4_G | Anion/Solvent/Minor-Residue Disorder (Resd 29 )  | 100% | Note |
| PLAT302_ALERT_4_G | Anion/Solvent/Minor-Residue Disorder (Resd 30 )  | 100% | Note |
| PLAT302_ALERT_4_G | Anion/Solvent/Minor-Residue Disorder (Resd 31 )  | 100% | Note |
| PLAT302_ALERT_4_G | Anion/Solvent/Minor-Residue Disorder (Resd 32 )  | 100% | Note |
| PLAT302_ALERT_4_G | Anion/Solvent/Minor-Residue Disorder (Resd 33 )  | 100% | Note |
| PLAT302_ALERT_4_G | Anion/Solvent/Minor-Residue Disorder (Resd 34 )  | 100% | Note |
| PLAT302_ALERT_4_G | Anion/Solvent/Minor-Residue Disorder (Resd 35 )  | 100% | Note |
| PLAT302_ALERT_4_G | Anion/Solvent/Minor-Residue Disorder (Resd 36 )  | 100% | Note |
| PLAT302_ALERT_4_G | Anion/Solvent/Minor-Residue Disorder (Resd 37 )  | 100% | Note |
| PLAT302_ALERT_4_G | Anion/Solvent/Minor-Residue Disorder (Resd 46 )  | 100% | Note |
| PLAT302_ALERT_4_G | Anion/Solvent/Minor-Residue Disorder (Resd 47 )  | 100% | Note |
| PLAT302_ALERT_4_G | Anion/Solvent/Minor-Residue Disorder (Resd 48 )  | 100% | Note |
| PLAT302_ALERT_4_G | Anion/Solvent/Minor-Residue Disorder (Resd 49 )  | 100% | Note |
| PLAT302_ALERT_4_G | Anion/Solvent/Minor-Residue Disorder (Resd 50 )  | 100% | Note |
| PLAT302_ALERT_4_G | Anion/Solvent/Minor-Residue Disorder (Resd 51 )  | 100% | Note |
| PLAT302_ALERT_4_G | Anion/Solvent/Minor-Residue Disorder (Resd 52 )  | 100% | Note |
| PLAT302_ALERT_4_G | Anion/Solvent/Minor-Residue Disorder (Resd 53 )  | 100% | Note |
| PLAT302_ALERT_4_G | Anion/Solvent/Minor-Residue Disorder (Resd 54 )  | 100% | Note |
| PLAT302_ALERT_4_G | Anion/Solvent/Minor-Residue Disorder (Resd 55 )  | 100% | Note |
| PLAT302_ALERT_4_G | Anion/Solvent/Minor-Residue Disorder (Resd 56 )  | 100% | Note |
| PLAT302_ALERT_4_G | Anion/Solvent/Minor-Residue Disorder (Resd 57 )  | 100% | Note |
| PLAT302_ALERT_4_G | Anion/Solvent/Minor-Residue Disorder (Resd 58 )  | 100% | Note |
| PLAT302_ALERT_4_G | Anion/Solvent/Minor-Residue Disorder (Resd 59 )  | 100% | Note |
| PLAT302_ALERT_4_G | Anion/Solvent/Minor-Residue Disorder (Resd 60 )  | 100% | Note |
| PLAT302_ALERT_4_G | Anion/Solvent/Minor-Residue Disorder (Resd 61 )  | 100% | Note |
| PLAT302_ALERT_4_G | Anion/Solvent/Minor-Residue Disorder (Resd 62 )  | 100% | Note |
| PLAT302_ALERT_4_G | Anion/Solvent/Minor-Residue Disorder (Resd 63 )  | 100% | Note |
| PLAT720_ALERT_4_G | Number of Unusual/Non-Standard Labels .....      | 59   | Note |
| PLAT794_ALERT_5_G | Tentative Bond Valency for Tl1 (I) .             | 0.80 | Info |
| PLAT794_ALERT_5_G | Tentative Bond Valency for Tl2 (I) .             | 0.68 | Info |
| PLAT794_ALERT_5_G | Tentative Bond Valency for Tl3 (I) .             | 0.76 | Info |
| PLAT794_ALERT_5_G | Tentative Bond Valency for Tl4 (I) .             | 0.80 | Info |
| PLAT811_ALERT_5_G | No ADDSYM Analysis: Too Many Excluded Atoms .... | !    | Info |
| PLAT860_ALERT_3_G | Number of Least-Squares Restraints .....         | 450  | Note |
| PLAT933_ALERT_2_G | Number of OMIT Records in Embedded .res File ... | 20   | Note |

---

0 **ALERT level A** = Most likely a serious problem - resolve or explain

0 **ALERT level B** = A potentially serious problem, consider carefully

7 **ALERT level C** = Check. Ensure it is not caused by an omission or oversight

94 **ALERT level G** = General information/check it is not something unexpected

35 **ALERT type 1** CIF construction/syntax error, inconsistent or missing data

5 ALERT type 2 Indicator that the structure model may be wrong or deficient  
5 ALERT type 3 Indicator that the structure quality may be low  
50 ALERT type 4 Improvement, methodology, query or suggestion  
6 ALERT type 5 Informative message, check

---

---

It is advisable to attempt to resolve as many as possible of the alerts in all categories. Often the minor alerts point to easily fixed oversights, errors and omissions in your CIF or refinement strategy, so attention to these fine details can be worthwhile. In order to resolve some of the more serious problems it may be necessary to carry out additional measurements or structure refinements. However, the purpose of your study may justify the reported deviations and the more serious of these should normally be commented upon in the discussion or experimental section of a paper or in the "special\_details" fields of the CIF. checkCIF was carefully designed to identify outliers and unusual parameters, but every test has its limitations and alerts that are not important in a particular case may appear. Conversely, the absence of alerts does not guarantee there are no aspects of the results needing attention. It is up to the individual to critically assess their own results and, if necessary, seek expert advice.

### **Publication of your CIF in IUCr journals**

A basic structural check has been run on your CIF. These basic checks will be run on all CIFs submitted for publication in IUCr journals (*Acta Crystallographica*, *Journal of Applied Crystallography*, *Journal of Synchrotron Radiation*); however, if you intend to submit to *Acta Crystallographica Section C* or *E* or *IUCrData*, you should make sure that full publication checks are run on the final version of your CIF prior to submission.

### **Publication of your CIF in other journals**

Please refer to the *Notes for Authors* of the relevant journal for any special instructions relating to CIF submission.

---

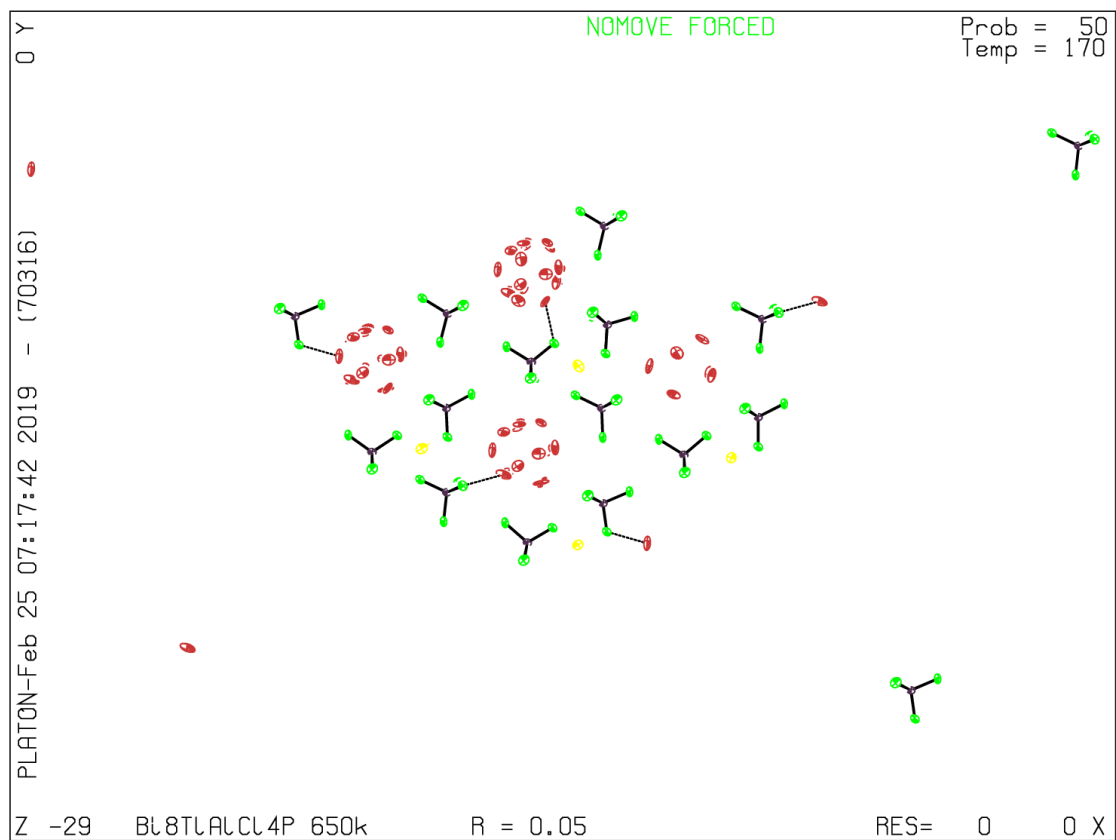

Supplement: s1 [file s1]
