# Supplementary material
Source: MDPI journal article supplement (https://www.mdpi.com/2304-6740/7/4/45)
Supplement: s1 [file s1]

# Supplementary Materials: Low-Temperature Ordering in the Cluster Compound $(\text{Bi}_8)\text{Tl}[\text{AlCl}_4]_3$

Maximilian Knies, Martin Kaiser, Mai Lê Anh, Anastasia Efimova, Thomas Doert and Michael Ruck

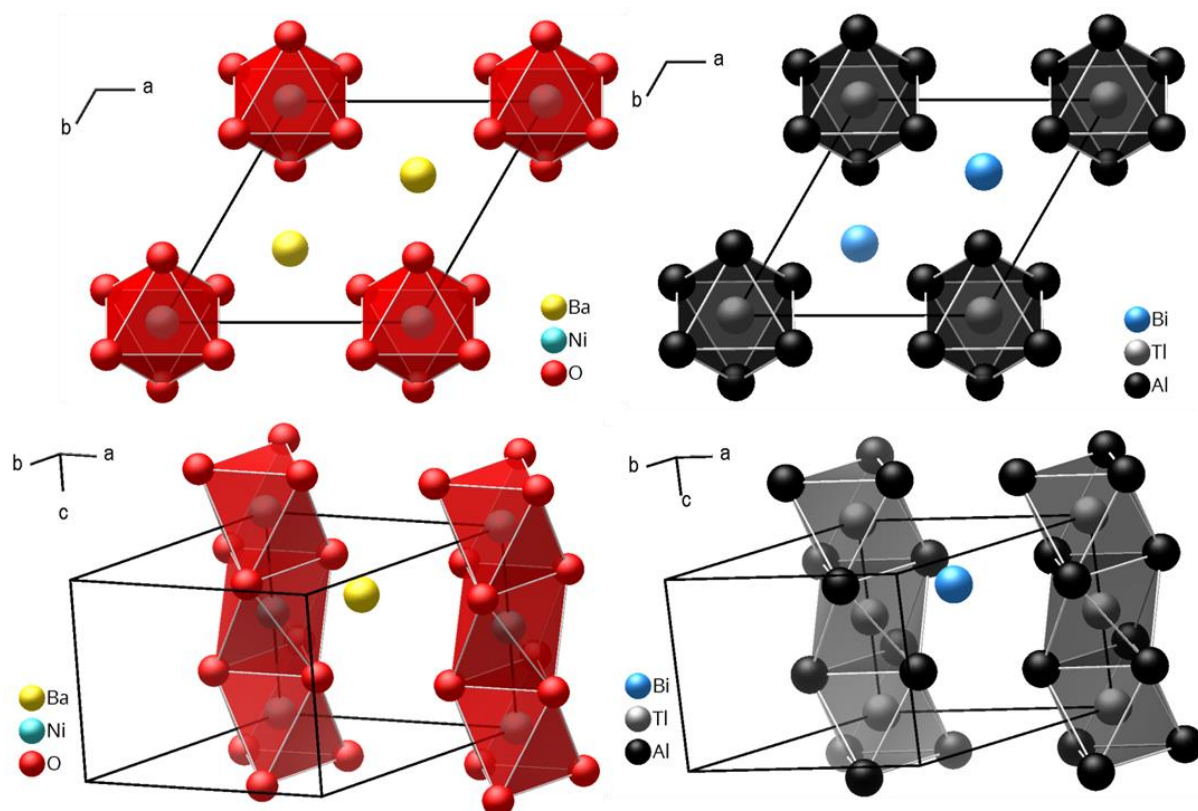

**Figure S1.** Representation of structural motifs in  $\text{BaNiO}_3$  (left) and  $\text{Bi}_8\text{Tl}[\text{AlCl}_4]_3$  (right) according to the hexagonal perovskite structure type. For  $\text{Bi}_8\text{Tl}[\text{AlCl}_4]_3$   $\text{Cl}^-$  ions were omitted and all atomic radii were set to 1 Å for clarity. The bismuth atom represents the center of the  $\text{Bi}_8^{2+}$  polycation, while the  $\text{Al}^{3+}$  and  $\text{Tl}^+$  positions remain unchanged.

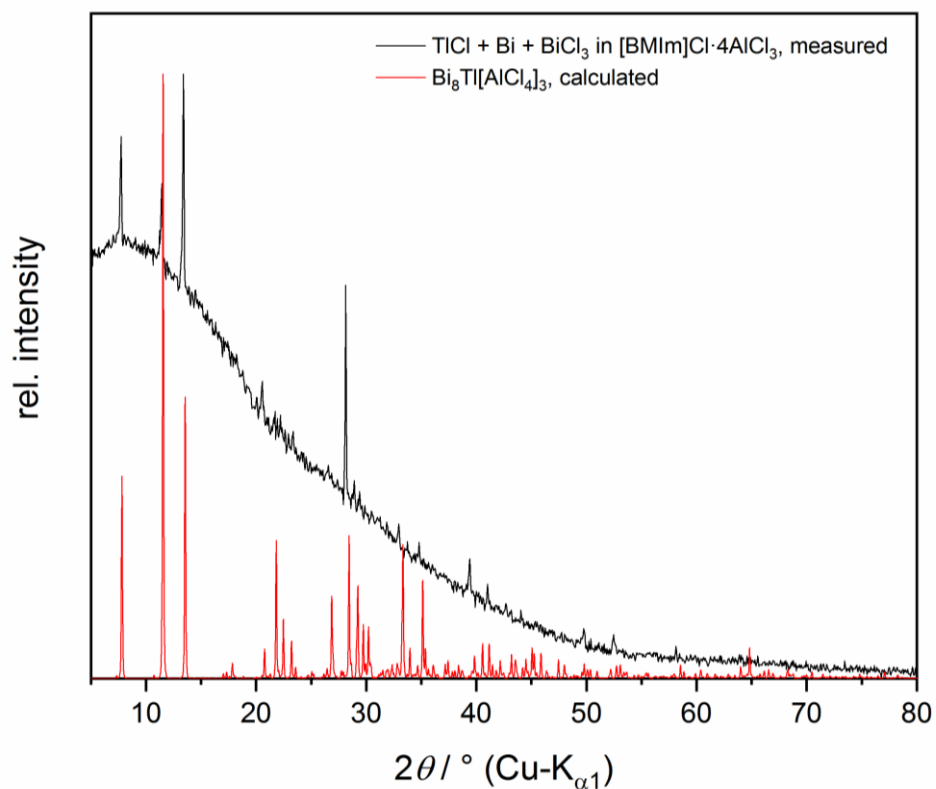

**Figure S2.** Powder diffractogram of a sample of  $\text{Bi}_8\text{Ti}[\text{AlCl}_4]_3$  crystals that were separated mechanically and analysed without further treatment.

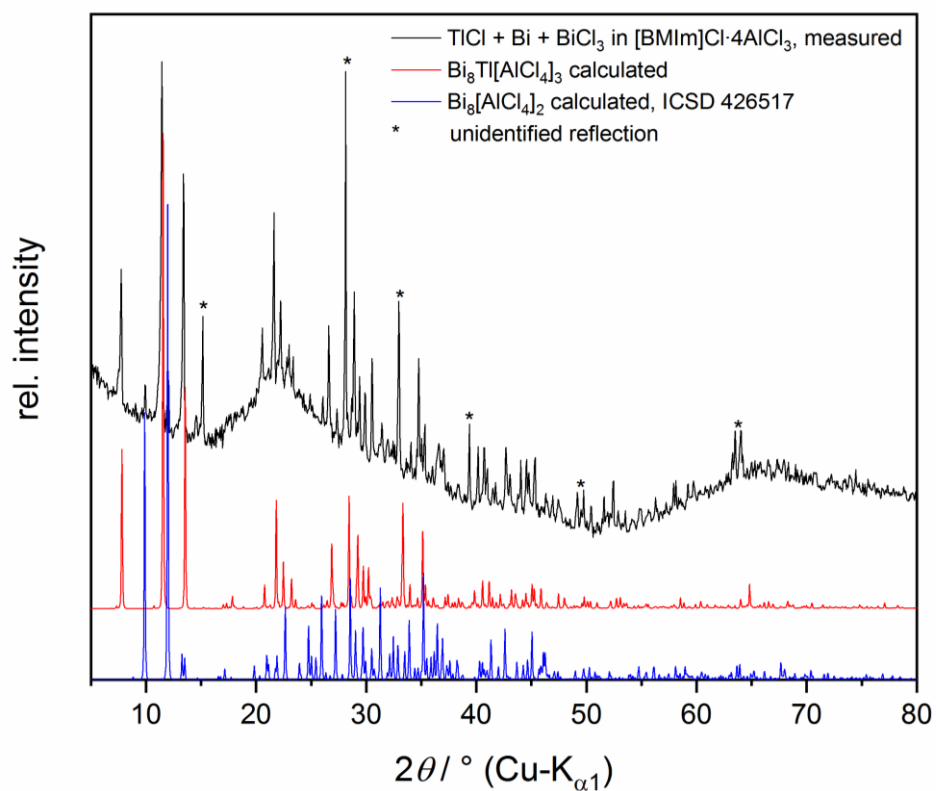

**Figure S3.** Powder diffractogram of the product of a  $\text{Bi}_8\text{Ti}[\text{AlCl}_4]_3$  synthesis after treatment with dry DCM.

**Table S1.** Selected interatomic distances  $d$  (/ pm) in  $(\text{Bi}_8)\text{Ti}[\text{AlCl}_4]_3$ . Bismuth atom sites marked with \* represent significant symmetry equivalent positions

| atom pair |      | $d$      |  | atom pair |      | $d$      |
|-----------|------|----------|--|-----------|------|----------|
| Bi1       | Bi2  | 302.5(2) |  | Bi3       | Bi4  | 307.1(2) |
| Bi1       | Bi2* | 304.9(2) |  | Bi4       | Bi4* | 306.5(3) |
| Bi1       | Bi3  | 307.6(3) |  | Ti1       | Cl1  | 373.8(3) |
| Bi1       | Bi4  | 305.0(3) |  | Ti1       | Cl2  | 337.1(3) |
| Bi2       | Bi3  | 315.9(2) |  | Al1       | Cl1  | 211.8(3) |
| Bi2       | Bi4  | 309.8(2) |  | Al1       | Cl2  | 211.8(5) |
| Bi3       | Bi3* | 305.0(3) |  | Al1       | Cl3  | 211.7(6) |

**Table S2.** Coordinates, coefficients  $U_{ij}$  (/  $\text{pm}^2$ ) of the tensors of the anisotropic displacement, and equivalent displacement parameters for the atoms in  $(\text{Bi}_8)\text{Ti}[\text{AlCl}_4]_3$ .  $U_{\text{eq}}$  is defined as one third of the trace of the orthogonalized  $U_{ij}$  tensor. Special Wyckoff positions: Ti1 –  $2b$ ; Al1, Bi2, Cl2, Cl3 –  $6h$ ; general Wyckoff position  $12i$  for Bi1, Bi3, Bi4, Cl1.

| Atom | $x$       | $y$       | $z$       | $U_{11}$ | $U_{22}$ | $U_{33}$ | $U_{23}$ | $U_{13}$ | $U_{12}$ | $U_{\text{eq}}$ |
|------|-----------|-----------|-----------|----------|----------|----------|----------|----------|----------|-----------------|
| Bi1  | 0.7652(2) | 0.3827(2) | 0.4604(2) | 108(1)   | 76(1)    | 72(1)    | −29(1)   | −66(1)   | 54(1)    | 82(1)           |
| Bi2  | 0.7768(1) | 0.5485(1) | 0.25      | 78(1)    | 24(1)    | 99(1)    | 0        | 0        | 5(1)     | 76(1)           |
| Bi3  | 0.5334(2) | 0.1536(1) | 0.3967(2) | 88(1)    | 44(1)    | 48(1)    | 21(1)    | 17(1)    | 14(1)    | 68(1)           |
| Bi4  | 0.5422(2) | 0.3935(2) | 0.3974(2) | 86(1)    | 77(1)    | 56(1)    | 3(1)     | 31(1)    | 57(1)    | 66(1)           |
| Ti1  | 0         | 0         | 0         | 73(1)    | 73(1)    | 24(1)    | 0        | 0        | 0        | 56(1)           |
| Cl1  | 0.0648(2) | 0.3060(2) | 0.0818(2) | 67(2)    | 68(2)    | 34(1)    | 3(1)     | −10(1)   | 32(1)    | 57(1)           |
| Cl2  | 0.1724(4) | 0.1556(3) | 0.25      | 84(3)    | 52(2)    | 41(2)    | 0        | 0        | 41(2)    | 56(1)           |
| Cl3  | 0.3286(4) | 0.4649(4) | 0.25      | 60(3)    | 60(2)    | 49(2)    | 0        | 0        | −3(2)    | 71(1)           |
| Al1  | 0.1588(4) | 0.3110(3) | 0.25      | 44(2)    | 35(2)    | 34(2)    | 0        | 0        | 14(2)    | 37(1)           |

### Additional discussion

In order to refine the structure in a space group matching the point group of the isolated  $\text{Bi}_8^{2+}$  clusters, we lowered the symmetry to the monoclinic space group  $P 1 1 2_1$  (no. 4). The lattice parameters do not deviate significantly from the hexagonal refinement:  $a = 1303.3(1)$  pm,  $b = 1304.2(1)$  pm,  $c = 1039.9(1)$  pm and  $\gamma = 120^\circ$ .

All previously equivalent interatomic distances were distinguished due to the absence of symmetry restrictions and the Al–Cl distances now show similar deviations to the ones reported for  $M[\text{AlCl}_4]$  ( $M = \text{Li}, \text{Na}, \text{K}$ ) and  $(\text{Bi}_8)[\text{AlCl}_4]_2$ .<sup>[7,28–30]</sup> However, there are no major changes in the structure after the symmetry reduction. The three  $\text{Bi}_8^{2+}$  orientations were successfully isolated and their occupancy factors converged to ~33% each without any restrictions.

**Table S3.** Coordinates, coefficients  $U_{ij}$  ( $/\text{pm}^2$ ) of the tensors of the anisotropic displacement, and equivalent displacement parameters for the atoms in  $(\text{Bi}_8)\text{Ti}[\text{AlCl}_4]_3$  at 170(2) K.  $U_{\text{eq}}$  is defined as one third of the trace of the orthogonalized  $U_{ij}$  tensor. Only the main orientations of disordered bismuth positions are shown. Equal atomic displacement parameters were used for all aluminum atoms as well as equally oriented chloride ions.

| Atom | x         | y          | z          | $U_{11}$ | $U_{22}$ | $U_{33}$ | $U_{23}$ | $U_{13}$ | $U_{12}$ | $U_{\text{eq}}$ |
|------|-----------|------------|------------|----------|----------|----------|----------|----------|----------|-----------------|
| Bi1  | 0.2755(2) | 0.8906(2)  | −0.0067(2) | 23(2)    | 52(3)    | 78(3)    | −11(3)   | −7(3)    | 9(2)     | 55(1)           |
| Bi2  | 0.1958(2) | 0.8063(2)  | 0.0632(2)  | 75(4)    | 65(4)    | 62(3)    | 29(3)    | −30(3)   | 24(3)    | 72(2)           |
| Bi3  | 0.1086(2) | 0.7286(2)  | −0.0053(2) | 68(4)    | 21(3)    | 74(5)    | 4(3)     | −31(3)   | 22(3)    | 74(2)           |
| Bi4  | 0.1877(2) | 0.8116(2)  | −0.0763(1) | 51(3)    | 79(4)    | 40(3)    | −31(2)   | 12(2)    | 13(3)    | 65(2)           |
| Bi5  | 0.1934(2) | 0.9265(2)  | −0.0516(1) | 95(4)    | 48(3)    | 68(3)    | 21(3)    | −18(3)   | 28(3)    | 74(2)           |
| Bi6  | 0.1991(2) | 0.9249(2)  | 0.0464(1)  | 53(3)    | 42(3)    | 64(3)    | −36(2)   | 7(2)     | 10(3)    | 59(2)           |
| Bi7  | 0.0796(2) | 0.8081(2)  | 0.0476(1)  | 35(3)    | 95(4)    | 53(3)    | −3(3)    | 27(2)    | 3(3)     | 74(2)           |
| Bi8  | 0.0747(2) | 0.8102(2)  | −0.0503(1) | 53(3)    | 62(3)    | 49(3)    | −16(2)   | −26(2)   | 23(3)    | 57(2)           |
| Bi9  | 0.6100(3) | 0.8854(2)  | −0.0035(2) | 31(3)    | 53(4)    | 84(5)    | 4(4)     | 5(4)     | 35(3)    | 50(2)           |
| Bi10 | 0.6915(3) | 0.8855(3)  | 0.0670(2)  | 91(6)    | 93(6)    | 72(5)    | −61(5)   | −47(4)   | 59(6)    | 80(3)           |
| Bi11 | 0.7719(3) | 0.8795(3)  | −0.0013(2) | 30(5)    | 129(7)   | 104(7)   | −7(7)    | −16(5)   | 36(5)    | 89(3)           |
| Bi12 | 0.6900(3) | 0.8782(3)  | −0.0730(2) | 80(6)    | 112(6)   | 47(4)    | 49(4)    | 34(4)    | 63(5)    | 73(2)           |
| Bi13 | 0.5741(2) | 0.7690(3)  | −0.0509(2) | 50(5)    | 91(6)    | 65(4)    | −33(4)   | −29(4)   | 29(5)    | 72(2)           |
| Bi14 | 0.5723(3) | 0.7724(3)  | 0.0470(2)  | 60(5)    | 91(6)    | 68(4)    | 46(4)    | 43(4)    | 29(5)    | 77(2)           |
| Bi15 | 0.6878(3) | 0.7671(3)  | 0.0486(2)  | 116(7)   | 85(6)    | 45(4)    | 20(4)    | −5(4)    | 82(5)    | 68(2)           |
| Bi16 | 0.6893(3) | 0.7647(3)  | −0.0494(2) | 87(6)    | 90(6)    | 36(3)    | −15(4)   | 1(4)     | 63(5)    | 63(2)           |
| Bi17 | 0.1148(2) | 0.2250(2)  | 0.0026(2)  | 82(4)    | 25(3)    | 87(5)    | 4(3)     | 31(3)    | 34(3)    | 61(2)           |
| Bi18 | 0.1198(2) | 0.3096(2)  | 0.0724(2)  | 80(4)    | 58(3)    | 44(3)    | 4(2)     | 39(3)    | 32(3)    | 62(2)           |
| Bi19 | 0.1196(2) | 0.3923(2)  | 0.0034(2)  | 96(4)    | 86(4)    | 91(3)    | −14(4)   | −17(4)   | 79(3)    | 76(2)           |
| Bi20 | 0.1158(2) | 0.3083(2)  | −0.0677(2) | 124(5)   | 110(5)   | 58(3)    | −43(3)   | −58(3)   | 88(5)    | 85(2)           |
| Bi21 | 0.2270(2) | 0.3029(2)  | −0.0506(1) | 58(4)    | 65(4)    | 43(3)    | −19(2)   | 6(2)     | 33(3)    | 54(2)           |
| Bi22 | 0.2317(2) | 0.3036(2)  | 0.0474(1)  | 88(4)    | 100(4)   | 61(3)    | −19(3)   | −39(3)   | 80(4)    | 68(2)           |
| Bi23 | 0.2359(2) | 0.4239(2)  | 0.0490(1)  | 38(3)    | 27(3)    | 49(2)    | −18(2)   | −11(2)   | −9(2)    | 49(1)           |
| Bi24 | 0.2307(3) | 0.4222(2)  | −0.0491(1) | 130(6)   | 61(4)    | 32(3)    | 25(2)    | 28(3)    | 34(4)    | 80(2)           |
| Bi25 | 0.6112(2) | 0.3868(1)  | 0.0026(1)  | 115(4)   | 77(3)    | 67(3)    | −10(3)   | −1(3)    | 83(3)    | 71(2)           |
| Bi26 | 0.6936(2) | 0.3818(2)  | 0.0700(1)  | 67(3)    | 92(4)    | 62(3)    | −57(3)   | −31(2)   | 38(3)    | 74(2)           |
| Bi27 | 0.7728(1) | 0.3807(2)  | −0.0013(1) | 22(3)    | 91(4)    | 95(3)    | 7(3)     | 5(3)     | 10(3)    | 77(2)           |
| Bi28 | 0.6900(2) | 0.3848(2)  | −0.0699(1) | 73(3)    | 115(4)   | 65(3)    | 65(3)    | 34(2)    | 62(3)    | 78(2)           |
| Bi29 | 0.5738(2) | 0.2743(2)  | −0.0507(1) | 58(3)    | 85(3)    | 35(2)    | −13(2)   | −25(2)   | 31(3)    | 62(1)           |
| Bi30 | 0.5743(2) | 0.2700(2)  | 0.0474(1)  | 34(3)    | 74(3)    | 51(3)    | 29(2)    | 17(2)    | 7(2)     | 62(1)           |
| Bi31 | 0.6898(2) | 0.2650(2)  | 0.0454(1)  | 105(4)   | 69(3)    | 57(2)    | 20(2)    | 3(3)     | 69(3)    | 66(1)           |
| Bi32 | 0.6888(2) | 0.2694(2)  | −0.0526(1) | 119(4)   | 116(4)   | 34(2)    | −19(3)   | −6(2)    | 92(4)    | 75(2)           |
| Ti1  | 0.0035(2) | −0.0046(2) | 0.0817(1)  | 58(3)    | 45(3)    | 22(3)    | 0(2)     | −2(2)    | 24(3)    | 42(1)           |
| Ti2  | 0.4973(2) | 0.0036(2)  | 0.0822(2)  | 57(3)    | 51(3)    | 22(1)    | 0(3)     | 1(3)     | 30(3)    | 42(1)           |
| Ti3  | 0.4945(2) | 0.4969(2)  | 0.0820(1)  | 56(3)    | 87(4)    | 24(3)    | 4(2)     | 1(2)     | 40(3)    | 54(2)           |
| Ti4  | 0.0073(2) | 0.5064(2)  | 0.0828(1)  | 69(4)    | 51(3)    | 22(2)    | 0(2)     | 2(2)     | 26(3)    | 50(2)           |
| Cl1  | 0.420(2)  | 0.927(2)   | −0.0016(7) | 30(3)    | 46(3)    | 36(1)    | −4(3)    | 0(3)     | 18(3)    | 38(1)           |
| Cl2  | 0.329(2)  | 0.776(2)   | 0.0011(6)  | 43(4)    | 48(4)    | 46(1)    | −4(3)    | 2(2)     | 34(3)    | 40(1)           |

|      |            |           |            |       |       |       |       |       |       |       |
|------|------------|-----------|------------|-------|-------|-------|-------|-------|-------|-------|
| Cl3  | 0.468(2)   | 0.8446(9) | 0.0530(6)  | 66(4) | 50(4) | 29(2) | 4(3)  | 11(3) | 28(4) | 49(1) |
| Cl4  | 0.4625(9)  | 0.8444(9) | −0.0583(6) | 43(4) | 53(4) | 19(2) | 8(3)  | −5(3) | 26(4) | 38(1) |
| Cl5  | 0.516(2)   | 0.1032(9) | −0.0012(7) | 30(3) | 46(3) | 36(1) | −4(3) | 0(3)  | 18(3) | 38(1) |
| Cl6  | 0.426(2)   | 0.166(2)  | 0.0012(7)  | 43(4) | 48(4) | 46(1) | −4(3) | 2(2)  | 34(3) | 40(1) |
| Cl7  | 0.379(2)   | 0.034(2)  | 0.0517(6)  | 66(4) | 50(4) | 29(2) | 4(3)  | 11(3) | 28(4) | 49(1) |
| Cl8  | 0.385(2)   | 0.038(2)  | −0.0600(7) | 43(4) | 53(4) | 19(2) | 8(3)  | −5(3) | 26(4) | 38(1) |
| Cl9  | 0.002(2)   | 0.580(2)  | −0.0044(7) | 30(3) | 46(3) | 36(1) | −4(3) | 0(3)  | 18(3) | 38(1) |
| Cl10 | −0.0786(9) | 0.657(2)  | −0.0011(6) | 43(4) | 48(4) | 46(1) | −4(3) | 2(2)  | 34(3) | 40(1) |
| Cl11 | −0.1307(9) | 0.5253(9) | 0.0529(6)  | 66(4) | 50(4) | 29(2) | 4(3)  | 11(3) | 28(4) | 49(1) |
| Cl12 | −0.1275(9) | 0.5214(8) | −0.0551(6) | 43(4) | 53(4) | 19(2) | 8(3)  | −5(3) | 26(4) | 38(1) |
| Cl13 | 0.0810(9)  | 0.4984(9) | −0.0054(6) | 30(3) | 46(3) | 36(1) | −4(3) | 0(3)  | 18(3) | 38(1) |
| Cl14 | 0.2381(9)  | 0.5814(9) | 0.0005(6)  | 43(4) | 48(4) | 46(1) | −4(3) | 2(2)  | 34(3) | 40(1) |
| Cl15 | 0.153(2)   | 0.6321(8) | 0.0492(6)  | 66(4) | 50(4) | 29(2) | 4(3)  | 11(3) | 28(4) | 49(1) |
| Cl16 | 0.155(2)   | 0.625(2)  | −0.0609(6) | 43(4) | 53(4) | 19(2) | 8(3)  | −5(3) | 26(4) | 38(1) |
| Cl17 | 0.920(2)   | 0.928(2)  | −0.0037(6) | 30(3) | 46(3) | 36(1) | −4(3) | 0(3)  | 18(3) | 38(1) |
| Cl18 | 0.8289(6)  | 0.7776(6) | −0.0022(5) | 43(4) | 48(4) | 46(1) | −4(3) | 2(2)  | 34(3) | 40(1) |
| Cl19 | 0.9766(9)  | 0.8521(9) | 0.0477(5)  | 66(4) | 50(4) | 29(2) | 4(3)  | 11(3) | 28(4) | 49(1) |
| Cl20 | 0.9672(8)  | 0.8550(7) | −0.0632(5) | 43(4) | 53(4) | 19(2) | 8(3)  | −5(3) | 26(4) | 38(1) |
| Cl21 | 0.5152(7)  | 0.5971(6) | 0.0005(6)  | 30(3) | 46(3) | 36(1) | −4(3) | 0(3)  | 18(3) | 38(1) |
| Cl22 | 0.427(2)   | 0.661(2)  | −0.0043(7) | 43(4) | 48(4) | 46(1) | −4(3) | 2(2)  | 34(3) | 40(1) |
| Cl23 | 0.382(2)   | 0.537(2)  | 0.0565(7)  | 66(4) | 50(4) | 29(2) | 4(3)  | 11(3) | 28(4) | 49(1) |
| Cl24 | 0.3851(9)  | 0.5285(9) | −0.0555(6) | 43(4) | 53(4) | 19(2) | 8(3)  | −5(3) | 26(4) | 38(1) |
| Cl25 | 0.571(2)   | −0.008(2) | −0.0024(6) | 30(3) | 46(3) | 36(1) | −4(3) | 0(3)  | 18(3) | 38(1) |
| Cl26 | 0.7320(9)  | 0.0732(9) | 0.0002(6)  | 43(4) | 48(4) | 46(1) | −4(3) | 2(2)  | 34(3) | 40(1) |
| Cl27 | 0.655(2)   | 0.121(2)  | 0.0528(6)  | 66(4) | 50(4) | 29(2) | 4(3)  | 11(3) | 28(4) | 49(1) |
| Cl28 | 0.6506(9)  | 0.1167(9) | −0.0586(6) | 43(4) | 53(4) | 19(2) | 8(3)  | −5(3) | 26(4) | 38(1) |
| Cl29 | 0.087(2)   | −0.013(2) | −0.0015(6) | 30(3) | 46(3) | 36(1) | −4(3) | 0(3)  | 18(3) | 38(1) |
| Cl30 | 0.2341(8)  | 0.0642(7) | −0.0012(6) | 43(4) | 48(4) | 46(1) | −4(3) | 2(2)  | 34(3) | 40(1) |
| Cl31 | 0.155(2)   | 0.118(2)  | 0.0565(8)  | 66(4) | 50(4) | 29(2) | 4(3)  | 11(3) | 28(4) | 49(1) |
| Cl32 | 0.1488(9)  | 0.1165(9) | −0.0570(6) | 43(4) | 53(4) | 19(2) | 8(3)  | −5(3) | 26(4) | 38(1) |
| Cl33 | 0.4083(7)  | 0.4181(9) | −0.0006(7) | 30(3) | 46(3) | 36(1) | −4(3) | 0(3)  | 18(3) | 38(1) |
| Cl34 | 0.3382(8)  | 0.2581(8) | −0.0031(6) | 43(4) | 48(4) | 46(1) | −4(3) | 2(2)  | 34(3) | 40(1) |
| Cl35 | 0.465(2)   | 0.3427(9) | 0.0506(6)  | 66(4) | 50(4) | 29(2) | 4(3)  | 11(3) | 28(4) | 49(1) |
| Cl36 | 0.463(2)   | 0.349(2)  | −0.0596(6) | 43(4) | 53(4) | 19(2) | 8(3)  | −5(3) | 26(4) | 38(1) |
| Cl37 | 0.008(2)   | 0.082(2)  | −0.0004(7) | 30(3) | 46(3) | 36(1) | −4(3) | 0(3)  | 18(3) | 38(1) |
| Cl38 | −0.0581(8) | 0.1686(9) | −0.0024(7) | 43(4) | 48(4) | 46(1) | −4(3) | 2(2)  | 34(3) | 40(1) |
| Cl39 | −0.1284(9) | 0.0353(8) | 0.0508(5)  | 66(4) | 50(4) | 29(2) | 4(3)  | 11(3) | 28(4) | 49(1) |
| Cl40 | −0.1159(8) | 0.0361(8) | −0.0615(5) | 43(4) | 53(4) | 19(2) | 8(3)  | −5(3) | 26(4) | 38(1) |
| Cl41 | 0.573(2)   | 0.489(2)  | −0.0007(7) | 30(3) | 46(3) | 36(1) | −4(3) | 0(3)  | 18(3) | 38(1) |
| Cl42 | 0.7220(9)  | 0.5489(8) | −0.0038(6) | 43(4) | 48(4) | 46(1) | −4(3) | 2(2)  | 34(3) | 40(1) |
| Cl43 | 0.6650(8)  | 0.6257(8) | 0.0508(5)  | 66(4) | 50(4) | 29(2) | 4(3)  | 11(3) | 28(4) | 49(1) |
| Cl44 | 0.6509(8)  | 0.6146(8) | −0.0619(5) | 43(4) | 53(4) | 19(2) | 8(3)  | −5(3) | 26(4) | 38(1) |
| Cl45 | 0.919(2)   | 0.421(2)  | 0.0032(7)  | 30(3) | 46(3) | 36(1) | −4(3) | 0(3)  | 18(3) | 38(1) |
| Cl46 | 0.843(2)   | 0.2668(9) | −0.0013(7) | 43(4) | 48(4) | 46(1) | −4(3) | 2(2)  | 34(3) | 40(1) |
| Cl47 | 0.973(2)   | 0.3519(9) | −0.0572(6) | 66(4) | 50(4) | 29(2) | 4(3)  | 11(3) | 28(4) | 49(1) |

|      |           |           |            |       |       |       |       |       |       |       |
|------|-----------|-----------|------------|-------|-------|-------|-------|-------|-------|-------|
| Cl48 | 0.9735(8) | 0.3385(8) | 0.0571(5)  | 43(4) | 53(4) | 19(2) | 8(3)  | −5(3) | 26(4) | 38(1) |
| Al1  | 0.419(3)  | 0.845(3)  | 0.0006(8)  | 29(5) | 33(5) | 18(1) | −3(4) | −7(3) | 12(5) | 28(1) |
| Al2  | 0.426(3)  | 0.084(3)  | −0.0012(8) | 29(5) | 33(5) | 18(1) | −3(4) | −7(3) | 12(5) | 28(1) |
| Al3  | −0.086(3) | 0.572(3)  | −0.0007(7) | 29(5) | 33(5) | 18(1) | −3(4) | −7(3) | 12(5) | 28(1) |
| Al4  | 0.159(3)  | 0.582(3)  | −0.0046(8) | 29(5) | 33(5) | 18(1) | −3(4) | −7(3) | 12(5) | 28(1) |
| Al5  | 0.921(3)  | 0.849(3)  | −0.0037(8) | 29(5) | 33(5) | 18(1) | −3(4) | −7(3) | 12(5) | 28(1) |
| Al6  | 0.427(3)  | 0.580(3)  | 0.0015(8)  | 29(5) | 33(5) | 18(1) | −3(4) | −7(3) | 12(5) | 28(1) |
| Al7  | 0.653(3)  | 0.076(3)  | −0.0014(7) | 29(5) | 33(5) | 18(1) | −3(4) | −7(3) | 12(5) | 28(1) |
| Al8  | 0.158(3)  | 0.073(3)  | −0.0003(7) | 29(5) | 33(5) | 18(1) | −3(4) | −7(3) | 12(5) | 28(1) |
| Al9  | 0.417(3)  | 0.342(3)  | −0.0019(8) | 29(5) | 33(5) | 18(1) | −3(4) | −7(3) | 12(5) | 28(1) |
| Al10 | −0.075(3) | 0.079(3)  | −0.0012(7) | 29(5) | 33(5) | 18(1) | −3(4) | −7(3) | 12(5) | 28(1) |
| Al11 | 0.655(3)  | 0.569(3)  | −0.0027(7) | 29(5) | 33(5) | 18(1) | −3(4) | −7(3) | 12(5) | 28(1) |
| Al12 | 0.929(3)  | 0.344(3)  | 0.0013(7)  | 29(5) | 33(5) | 18(1) | −3(4) | −7(3) | 12(5) | 28(1) |

---
